# Supplementary material
Source: Springer Nature journal article supplement (https://www.springermedizin.de/resource/supplementary/13048_2009_26_MOESM4_ESM.pdf/9664734)

Phospho-Akt

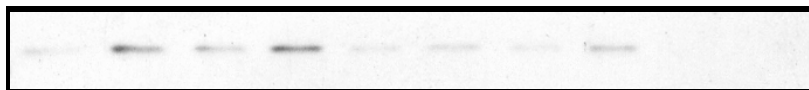

Total-Akt

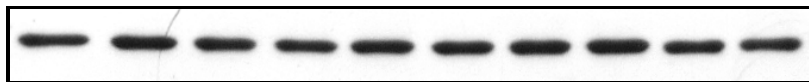

LH

- + - + - + - + - +

CTL

H89

U0126

W

LY

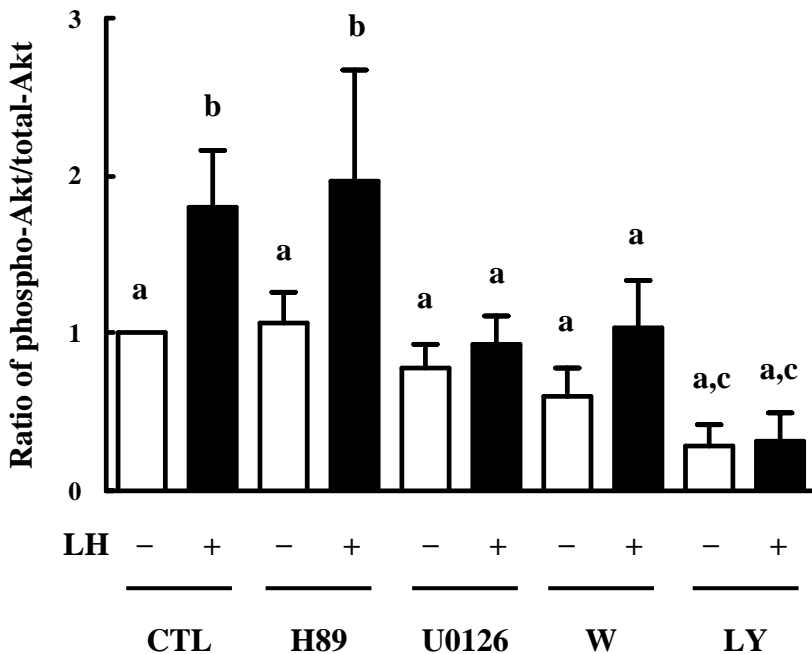

Supplement: MOESM4 [file 9664734]
